# Supplementary material
Source: publisher figshare collection journal article supplement (https://future-science-group.figshare.com/ndownloader/files/31518527)
Supplement: Supplementary file 1 [file 31518527]

| **Supplementary** **Table 1.** Imputation of missing LBPI and RMDQ data | |
| --- | --- |
| **Reason for missing data** | **Imputation method** |
| Death, TEAE, insufficient clinical response, or not meeting pre-specified efficacy criteria. | A multiple imputation version of a baseline-observation-carried-forward single imputation method. Multiple imputations were created by sampling from a normal distribution based on the patient’s baseline score and the SD (across all treatment groups) of all observed efficacy data at the specific time-point (for the entire ITT population). |
| All other reasons. | A multiple imputation version of a last-observation-carried-forward single imputation method. Multiple imputations were created by sampling from a normal distribution based on the patient’s last score and the SD (across all treatment groups) of all observed efficacy data at the specific time point (for the entire ITT population). |
| ITT = intent-to-treat population (all patients who received ≥ 1 dose of study medication); LBPI = low back pain intensity; RMDQ = Roland Morris Disability Questionnaire; SD = standard deviation; TEAE = treatment-emergent adverse event. | |
